# Supplementary material for: Formate and hydrogen in hydrothermal vents and their use by extremely thermophilic methanogens and heterotrophs
Source: Front Microbiol. 2023 Mar 6;14:1093018. doi: 10.3389/fmicb.2023.1093018 (PMC10025317; doi:10.3389/fmicb.2023.1093018)
Supplement: Supplementary file 2 [file Table_2.XLSX]

## Sheet: Symbol Summary
Table 3. Growth characteristics of Thermococci and presence of genes for formate transport (FT, black), formate
dehydrogenase (green), hydrogenases (red), and purine biosynthesis (blue). The number of circles per column
represents the number of times the gene(s) for that protein appears in the organism's genome. Open circles
represent incomplete operons. The open triangle for T. kodakarensis represents an sh-nfd-mbh operon configuration.
Organism	Accession #	T-opt	H2 ↔ formate	FT	Group 1A: frh-fhl-mbh	Group 1B: frh-nfd-mbh	Group 2: nfd-sh	Group 3: fh-sh	Group 4: fhl	Group 5: fdhA only	mbh	sh	frh	codh	purT	purP
Thermococcus paralvinellae ES1	CP006965	82	+	●	●				●		●●	●	●	●
Thermococcus barophilus CH5	CP013050	80	+	●	●			●			●●	●○	●	●		●
Thermococcus onnurineus NA1	CP000855	80	+	●●	●		●		●		●	●●	●	●
Thermococcus gammatolerans EJ3	CP001398	88	+	●	●				○	●	●		●	○	●	●
Thermococcus piezophilus CDGS	CP015520	75	+	●	●		●		●		●	●●	●		●	●
Thermococcus cleftensis CL1	CP003651	88	+	●		●				●	●	●●	●		●	●
Thermococcus nautili 30-1	CP007264	88	+	●		●				●	●	●●	●		●	●
Thermococcus kodakarensis KOD1	AP006878	85	+	●		∆				●	●	●			●	●
Thermococcus chitonophagus GC74	LN999010	85	-						●	●	●	●●			●	●
Thermococcus eurythermalis A501	CP008887	85	-					●	●	●	●	●	●		●	●
Thermococcus pacificus P-4	CP015102	88	-					●			●	●	●		●	●
Thermococcus litoralis NC-S	CP006670	88	-					●		●	●●	●●			●	●
Thermococcus barophilus MP	CP002372	85	-							●	●●	●●		●	●	●
Thermococcus sibiricus MM 739	CP001463	78	-							●	●●	●●			●	●
Thermococcus guaymasensis TYS	CP007140	88	-						○		●	●●	●	●	●	●
Thermococcus celer Vu 13	CP014854	88	-							●	●	●●			●	●
Thermococcus peptonophilus OG-1	CP014750	90	-						○	●	●	●●			●	●
Thermococcus barossii SHCK-94	CP015101	83	-							●	●●	●●		○	●	●
Thermococcus siculi RG-20	CP015103	85	-							●	●●	●●		○	●	●
Thermococcus radiotolerans EJ2	CP015106	88	-							●	●●	●●		○	●	●
Thermococcus profundus DT 5432	CP014862	80	-							●	●	●●		○	●	●
Thermococcus indicus IOH1	CP040846	80	ND							●	●●	●●	○		●	●
Thermococcus camini IRI35c	LR881183	80	-							●	●●	●●			●	●
Thermococcus gorgonarius W-12	CP014855	88	-						○		●	●
Palaeococcus pacificus DY20341	CP006019	83	+	●			●				●●	●●			●	●
Pyrococcus kukulkanii NCB100	CP010835	105	+	●	●				●	●	●	●●	●		●	●
Pyrococcus yayanosii CH1	CP002779	98	+	●	●						●	●●	●		●	●
Pyrococcus abyssi GE5	AL096836	96	-						●	●	●	●●			●	●
Pyrococcus furiosus Vc1	CP023154	100	-							●	●	●●			●	●
Pyrococcus horikoshii OT3	BA000001	98	-							●	●	●			●	●
T-opt, optimal temperature for growth.
†Growth on formate: ND, not determined.

## Sheet: Summary
	Accession #	Origin	T-opt	H2 ↔ formate	FT	trx-fdh-mbh	trx-nfd-mbh	trx-nfd	fhl-sh	fhl	fdhA	mbh	sh	trx	codh	purT	purP	Reference
Thermococcus paralvinellae ES1	CP006965	Endeavour Segment	82	+	TES1_1486	TES1_1479-1496				TES1_0095-0111		TES1_1465-1478 TES1_1451-1464	TES1_0164-0167	TES1_1498-1501	TES1_1197-1213			Pledger & Baross (1989)
Thermococcus barophilus CH5	CP013050	Logatchev, MAR	80	+	TBCH5_1756	TBCH5_1749-1767			TBCH5_0645-0659			TBCH5_1735-1748 TBCH5_1721-1734	TBCH5_2714-2717 TBCH5_0660-0662	TBCH5_1769-1772	TBCH5_1355-1371		TBCH5_2427	Kim et al. (2010)
Thermococcus onnurineus NA1	CP000855	PACMANUS	80	+	TON_0538 TON_1573	TON_1563-1580		TON_0538-0543		TON_0266-0282		TON_1582-1595	TON_0052-0055 TON_0534-0537	TON_1559-1561	TON_1016-1031			Bae et al. (2006)
Thermococcus gammatolerans EJ3	CP001398	Guaymas Basin	88	+	TGAM_0055	TGAM_0048-0065				TGAM_0241-0250	TGAM_0631	TGAM_0034-0047		TGAM_0066-0069	TGAM_0822-0824	TGAM_0638	TGAM_0757 TGAM_1267 +1266	Jolivet et al. (2003)
Thermococcus piezophilus CDGS	CP015520	Mid-Caymen Rise	75	+	A7C91_04275	A7C91_04240-04320		A7C91_08750-08765		A7C91_06940-07020		A7C91_04165-04230	A7C91_06185-06200 A7C91_08725-08740	A7C91_04330-04340		A7C91_05445	A7C91_05480	Dalmasso et al. (2016)
Thermococcus cleftensis CL1	CP003651	Cleft Segment	88	+	CL1_1145		CL1_1143-1148				CL1_0794	CL1_1129-1142	CL1_0641-0644 CL1_0141-0144	CL1_1149-1151		CL1_0787	CL1_0780	Holden et al. (2001)
Thermococcus nautili 30-1	CP007264	13 N EPR	88	+	BD01_1896		BD01_1894-1899				BD01_1760	BD01_1880-1893	BD01_2065-2068 BD01_0437-0440	BD01_1900-1902		BD01_1752	BD01_1742	Gorlas et al. (2014)
Thermococcus kodakarensis KOD1	AP006878	Kodakara Island	85	+	TK2079		TK2074-2079				TK0214	TK2080-2093	TK2069-2072			TK0207	TK0196, TK0431	Atomi et al. (2004)
Thermococcus chitonophagus GC74	LN999010	21 N EPR	85	-						CHITON_0826-0842	CHITON_1559	CHITON_1642-1654	CHITON_0947-0950 CHITON_1017-1020			CHITON_1145	CHITON_1565	Huber et al. (1995)
Thermococcus eurythermalis A501	CP008887	Guaymas Basin	85	-					TEU_09760-09820	TEU_06120-06215	TEU_00760	TEU_01950-02020	TEU_09725-09740	TEU_01935-01945		TEU_00730	TEU_00655	Zhao et al. (2015)
Thermococcus pacificus P-4	CP015102	New Zealand	88	-					A3L08_06500-06575			A3L08_01735-01800	A3L08_06480-06495	A3L08_06600-06610		A3L08_03245	A3L08_03280	Miroshnichenko et al. (1998)
Thermococcus litoralis NC-S	CP006670	Naples, Italy	88	-					OCC_12236-12311		OCC_06696	OCC_08659-08724 OCC_08589-08654	OCC_03052-03067 OCC_12216-12231			OCC_06671	OCC_05274	Belkin et al. (1985)
Thermococcus barophilus MP	CP002372	Snake Pit, MAR	85	-							TERMP_00460	TERMP_01485-01498 TERMP_01471-01484	TERMP_00067-00070 TERMP_00536-00539		TERMP_01139-01155	TERMP_02037	TERMP_02032	Marteinsson et al. (1999)
Thermococcus sibiricus MM 739	CP001463	Samotlor Oil Res.	78	-							TSIB_0067	TSIB_1296-1309 TSIB_1282-1295	TSIB_1520-1523 TSIB_0282-0285			TSIB_0063	TSIB_0049	Miroshnichenko et al. (2001)
Thermococcus guaymasensis TYS	CP007140	Guaymas Basin	88	-						X802_03640-03680		X802_04235-04300	X802_03235-03250 X802_07560-07575	X802_04305-04315	X802_05810-05895	X802_07060	X802_06580	Canganella et al. (1998)
Thermococcus celer Vu 13	CP014854	Vulcano, Italy	88	-							A3L02_01395	A3L02_07745-07810	A3L02_00955-00970 A3L02_02375-02390			A3L02_01415	A3L02_01515	Zillig et al. (1983)
Thermococcus peptonophilus OG-1	CP014750	Western Pacific	90	-						A0127_09450-09495	A0127_02945	A0127_05295-05360	A0127_07135-07150 A0127_05275-05290			A0127_02965	A0127_03015	Gonzales et al. (1995)
Thermococcus barossii SHCK-94	CP015101	Endeavour Segment	83	-							A3L01_00065	A3L01_08670-08735 A3L01_08740-08805	A3L01_00920-00935 A3L01_03415-03430		A3L01_08235-08245	A3L01_00095	A3L01_00130	Duffaud et al. (1998)
Thermococcus siculi RG-20	CP015103	Okinawa Trough	85	-							A3L11_03805	A3L11_02140-02205 A3L11_02210-02275	A3L11_04675-04690 A3L11_07375-07390		A3L11_01585-01595	A3L11_03825	A3L11_03860	Grote et al. (1999)
Thermococcus radiotolerans EJ2	CP015106	Guaymas Basin	88	-							A3L10_09785	A3L10_08150-08215 A3L10_08220-08290	A3L10_05625-05640 A3L10_03140-03155		A3L10_07620-07630	A3L10_09805	A3L10_09840	Jolivet et al. (2004)
Thermococcus profundus DT 5432	CP014862	Okinawa Trough	80	-							A3L09_08935	A3L09_01645-01710	A3L09_05730-05745 A3L09_05675-05690		A3L09_01360-01370	A3L09_08905	A3L09_08525	Kobayashi et al. (1994)
Thermococcus indicus IOH1	CP040846	Central Indian Ridge	80	ND							FH039_02070	FH039_00275-00340 FH039_00345-00410	FH039_02775-02790 FH039_05970-05985	FH039_06095-06100		FH039_02120	FH039_02230	Lim et al. (2020)
Thermococcus camini IRI35c	LR881183	Rainbow, MAR	80	-							TIRI35C_0225	TIRI35C_2072-2085 TIRI35C_2086-2099	TIRI35C_0406-0409 TIRI35C_0918-0921			TIRI35C_0235	TIRI35C_0244	Courtine et al. (2021)
Thermococcus gorgonarius W-12	CP014855	New Zealand	88	-						A3K92_08035-08080		A3K92_08500-08565	A3K92_08480-08495					Miroshnichenko et al. (1998)
Palaeococcus pacificus DY20341	CP006019	Ogasawara-Bonin Arc	83	+	PAP_03235			PAP_03210-03235				PAP_01095-01160 PAP_01165-01230	PAP_01490-01505 PAP_03240-03255			PAP_00580	+	Takai et al. (2000)
Pyrococcus kukulkanii NCB100	CP010835	Guaymas Basin	105	+	TQ32_09810	TQ32_09760-09845				TQ32_05165-05245	TQ32_10390	TQ32_09865-09930	TQ32_03115-03130 TQ32_02775-02790	TQ32_09745-09755		TQ32_03715	TQ32_10365	Callac et al. (2016)
Pyrococcus yayanosii CH1	CP002779	Ashadze, MAR	98	+	PYCH_11130	PYCH_11030-11200						PYCH_11230-11360	PYCH_00020-00050 PYCH_08370-08400	PYCH_10960-10980		PYCH_16020	PYCH_10750	Birrien et al. (2011)
Pyrococcus abyssi GE5	AL096836	North Fiji Basin	96	-						PAB1389-1402	PAB2442	PAB1884-1894	PAB0638-0641 PAB1784-1787			PAB1268	PAB0547	Erauso et al. (1993)
Pyrococcus furiosus Vc1	AE009950	Vulcano, Italy	100	-							PF1521	PF1423-1436				PF0430	PF1517	Fiala & Stetter (1986)
Pyrococcus horikoshii OT3	BA000001	Okinawa Trough	98	-							PH1353	PH1427-1440	PH1290-1294			PH0318	PH1348	Gonzales et al. (1998)

## Sheet: Group 1A fhl
Subunit	Tpar	Tbar	Tonn	Tgam	Tpiez	Pkul	Pyay
formate dehydrogenase alpha subunit	TES1_1496	TBCH5_1767	TON_1563	TGAM_0065	A7C91_04320	TQ32_09760	PYCH_11030
formate dehydrogenase	TES1_1495	TBCH5_1766	TON_1564	TGAM_0064	-	TQ32_09765	PYCH_11040
hydrogenase 4 subunit D	TES1_1494	TBCH5_1765	TON_1565	TGAM_0063	A7C91_04315	TQ32_09770	PYCH_11050
NADH dehydrogenase	TES1_1493	TBCH5_1764/63	TON_1566	TGAM_0062	A7C91_04310	TQ32_09775	PYCH_11060
hydantoin racemase	TES1_1492	TBCH5_1762	TON_1567	TGAM_0061	A7C91_04305	TQ32_09780	PYCH_11070
NADH:quinone oxidoreductase subunit H	TES1_1491	TBCH5_1761	TON_1568	TGAM_0060	-	TQ32_09785	PYCH_11080
NADH:quinone oxidoreductase subunit C	TES1_1490	TBCH5_1760	TON_1569	TGAM_0059	-	TQ32_09790	PYCH_11090
4Fe-4S binding protein	TES1_1489	TBCH5_1759	TON_1570	TGAM_0058	A7C91_04290	TQ32_09795	PYCH_11100
hydrogenase	TES1_1488	TBCH5_1758	TON_1571	TGAM_0057	A7C91_04285	TQ32_09800	PYCH_11110
hypothetical protein	TES1_1487	TBCH5_1757	TON_1572	TGAM_0056	A7C91_04280	TQ32_09805	PYCH_11120
formate transporter	TES1_1486	TBCH5_1756	TON_1573	TGAM_0055	A7C91_04275	TQ32_09810	PYCH_11130
pH regulation protein F	TES1_1485	TBCH5_1755	TON_1574	TGAM_0053	A7C91_04270	TQ32_09815	PYCH_11140
Na+/H+ antiporter subunit G	TES1_1484	TBCH5_1754	TON_1575	TGAM_0054	A7C91_04265	TQ32_09820	PYCH_11150
DUF4040 domain-containing protein	TES1_1483	TBCH5_1753	TON_1576	TGAM_0052	A7C91_04260	TQ32_09825	PYCH_11160
Na+/H+ antiporter	TES1_1482	TBCH5_1752	TON_1577	TGAM_0051	A7C91_04255	TQ32_09830	PYCH_11170
NADH:quinone oxidoreductase subunit K	TES1_1481	TBCH5_1751	TON_1578	TGAM_0050	A7C91_04250	TQ32_09835	PYCH_11180
Na+/H+ antiporter subunit E	TES1_1480	TBCH5_1750	TON_1579	TGAM_0049	A7C91_04245	TQ32_09840	PYCH_11190
Na+/H+ antiporter subunit D	TES1_1479	TBCH5_1749	TON_1580	TGAM_0048	A7C91_04240	TQ32_09845	PYCH_11200

## Sheet: Group 1B nfd
Subunit	Tcle	Tnaut	Tkod
formate dehydrogenase (sol., 1 FeS)	CL1_1148	BD01_1899	TK2076
4Fe-4S binding protein (sol., 4 FeS)	CL1_1147	BD01_1898	TK2077
4Fe-4S binding protein (sol., 2 FeS)	CL1_1146	BD01_1897	TK2078
formate transporter (8 TMS)	CL1_1145	BD01_1896	TK2079
FAD-dependent oxidoreductase (1 TMS)	CL1_1144	BD01_1895	TK2074
4Fe-4S binding protein (sol., 4 FeS)	CL1_1143	BD01_1894	TK2075

## Sheet: Group 2 nfd
Subunit	Tonn	Tpiez	Ppac
formate dehydrogenase (sol., 1 FeS)	TON_0539	A7C91_08750	PAP_03230
4Fe-4S binding protein (sol., 4 FeS)	TON_0540	A7C91_08755	PAP_03225
4Fe-4S binding protein (sol., 2 FeS)	TON_0541	A7C91_08760	PAP_03220
formate transporter (8 TMS)	TON_0538	A7C91_08745	PAP_03235
FAD-dependent oxidoreductase (1 TMS)	TON_0542	A7C91_08765	PAP_03215
4Fe-4S binding protein (sol., 4 FeS)	TON_0543	A7C91_08770	PAP_03210

## Sheet: Group 3 fhl
Subunit	Tbar	Teury	Tpac	Tlit
formate dehydrogenase alpha subunit	TBCH5_0659	TEU_09760	A3L08_06500	OCC_12236
formate dehydrogenase	TBCH5_0658	TEU_09750	A3L08_06505	OCC_12241
hydrogenase 4 subunit D	TBCH5_0657	TEU_09755	A3L08_06510	OCC_12246
hydantoin racemase	TBCH5_0656	TEU_09760	A3L08_06515	OCC_12251
NADH:quinone oxidoreductase subunit H	TBCH5_0655	TEU_09765	A3L08_06520	OCC_12256
NADH:quinone oxidoreductase subunit C	TBCH5_0654	TEU_09770	A3L08_06525	OCC_12261
4Fe-4S binding protein	TBCH5_0653	TEU_09775	A3L08_06530	OCC_12266
hydrogenase	TBCH5_0652	TEU_09780	A3L08_06535	OCC_12271
hypothetical protein	-	TEU_09785	A3L08_06540	OCC_12276
pH regulation protein F	TBCH5_0651	TEU_09790	A3L08_06545	OCC_12281
Na+/H+ antiporter subunit G	TBCH5_0650	TEU_09795	A3L08_06550	OCC_12286
DUF4040 domain-containing protein	TBCH5_0649	TEU_09800	A3L08_06555	OCC_12291
Na+/H+ antiporter	TBCH5_0648	TEU_09805	A3L08_06560	OCC_12296
NADH:quinone oxidoreductase subunit K	TBCH5_0647	TEU_09810	A3L08_06565	OCC_12301
Na+/H+ antiporter subunit E	TBCH5_0646	TEU_09815	A3L08_06570	OCC_12306
Na+/H+ antiporter subunit D	TBCH5_0645	TEU_09820	A3L08_06575	OCC_12311

## Sheet: Group 4 fhl
Subunit	Tpar	Tonn	Tgam	Tpiez	Tchit	Teury	Tguay	Tpept	Tgorg	Pkul	Paby
TetR/AcrR family transcriptional regulator	TES1_0095	TON_0282	TGAM_0250	A7C91_06940	CHITON_0826	TEU_06120	X802_03680	A0127_09450	A3K92_08035	TQ32_05245	PAB0976
formate dehydrogenase alpha subunit	TES1_0096	TON_0281	TGAM_0249	A7C91_06945	CHITON_0827	TEU_06125	X802_03675	A0127_09455	A3K92_08040	TQ32_05240	PAB1389
formate dehydrogenase	TES1_0097	TON_0280	TGAM_0248	A7C91_06950	CHITON_0828	TEU_06130	X802_03670	A0127_09460	A3K92_08045	TQ32_05235	PAB1390
hydrogenase 4 subunit D	TES1_0098	TON_0297	TGAM_0247	A7C91_06955	CHITON_0829	TEU_06135	X802_03665	A0127_09465	A3K92_08050	TQ32_05230	PAB1391
hydantoin racemase	TES1_0099	TON_0278	TGAM_0246	A7C91_06960	CHITON_0830	TEU_06140	X802_03660	A0127_09470	A3K92_08055	TQ32_05225	PAB1392
NADH:quinone oxidoreductase subunit H	TES1_0100	TON_0277	TGAM_0245	A7C91_06965	CHITON_0831	TEU_06145	X802_03655	A0127_09475	A3K92_08060	TQ32_05220	PAB1393
NADH:quinone oxidoreductase subunit C	TES1_0101	TON_0276	TGAM_0244	A7C91_06970	CHITON_0832	TEU_06150	X802_03650	A0127_09480	A3K92_08065	TQ32_05215	PAB1394
4Fe-4S binding protein	TES1_0102	TON_0275	TGAM_0243	A7C91_06975	CHITON_0833	TEU_06155	X802_03645	A0127_09485	A3K92_08070	TQ32_05210	PAB1395
hydrogenase	TES1_0103	TON_0274	TGAM_0242	A7C91_06980	CHITON_0834	TEU_06160	X802_03640	A0127_09490	A3K92_08075	TQ32_05205	PAB1396
hypothetical protein	TES1_0104	TON_0273	-	A7C91_06985	CHITON_0835	TEU_06165	-	+	A3K92_08080	TQ32_05200	PAB1397
hypothetical protein	-	-	TGAM_0241	-	-	-	X802_03635	A0127_09495	-	-	-
pH regulation protein F	TES1_0105	TON_0272	-	A7C91_06990	CHITON_0836	TEU_06185	-	-	A3K92_08275	TQ32_05195	PABs8723
Na+/H+ antiporter subunit G	TES1_0106	TON_0271	-	A7C91_06995	CHITON_0837	-	-	-	A3K92_08280	TQ32_05190	PAB1398
DUF4040 domain-containing protein	TES1_0107	TON_0270	-	A7C91_07000	CHITON_0838	TEU_06195	-	-	-	TQ32_05185	-
Na+/H+ antiporter	TES1_0108	TON_0269	-	A7C91_07005	CHITON_0839	TEU_06200	-	-	A3K92_08290	TQ32_05180	PAB1399
NADH:quinone oxidoreductase subunit K	TES1_0109	TON_0268	-	A7C91_07010	CHITON_0840	TEU_06205	-	-	A3K92_08295	TQ32_05175	PAB1400
Na+/H+ antiporter subunit E	TES1_0110	TON_0267	-	A7C91_07015	CHITON_0841	TEU_06210	-	-	A3K92_08300	TQ32_05170	PAB1401
Na+/H+ antiporter subunit D	TES1_0111	TON_0266	-	A7C91_07020	CHITON_0842	TEU_06215	-	-	A3K92_08305	TQ32_05165	PAB1402

## Sheet: mbh
	Tpar	TbarMP	TbarCH5	Trad	Tbar	Tsib	Tlit	Tind	Tsic	Tcam	Tcel	Tchi	Teury	Tpiez	Tgorg	Tnau	Tgam	Tonn	Tcle	Tguay	Tpac	Tpep	Tkod	Tprof	Paby	Phor	Pfur	Pyay	Pkul	Ppac	Mkand	Moki	Mtherm	Mign	Mform	Mjan	Mferv	Mvulc	Mbat	Minf
Membrane-bound hydrogenase MbhA subunit	TES1_1478 TES1_1464	TERMP_01498 TERMP_01484	TBCH5_1748 TBCH5_1734	A3L10_08150 A3L10_08220	A3L01_08670 A3L01_08740	TSIB_1309 TSIB_1295	OCC_08724 OCC_08654	FH039_00275 FH039_00345	A3L11_02140 A3L11_02210	TIRI35C_2072 TIRI35C_2086	A3L02_07745	CHITON_1654	TEU_01950	A7C91_04230	A3K92_08500	BD01_1893	TGAM_0047	TON_1582	CL1_1142	X802_04300	A3L08_01735	A0127_05295	TK2080	A3L09_01645	PAB1884	PH1427	PF1423	PYCH_11230	TQ32_09865	PAP_01095 PAP_01165
Membrane-bound hydrogenase MbhB subunit	TES1_1477 TES1_1463	TERMP_01497 TERMP_01483	TBCH5_1747 TBCH5_1733	A3L10_08155 A3L10_08225	A3L01_08675 A3L01_08745	TSIB_1308 TSIB_1294	OCC_08719 OCC_08649	FH039_00280 FH039_00350	A3L11_02145 A3L11_02215	TIRI35C_2073 TIRI35C_2087	A3L02_07750	CHITON_1653	TEU_01955	A7C91_04225	A3K92_08505	BD01_1892	TGAM_0046	TON_1583	CL1_1141	X802_04295	A3L08_01740	A0127_05300	TK2081	A3L09_01650	PAB3171	PH1427a	PF1424	PYCH_11240	TQ32_09870	PAP_01100 PAP_01170
Membrane-bound hydrogenase MbhC subunit	TES1_1476 TES1_1462	TERMP_01496 TERMP_01482	TBCH5_1746 TBCH5_1732	A3L10_08160 A3L10_08230	A3L01_08680 A3L01_08750	TSIB_1307 TSIB_1293	OCC_08714 OCC_08644	FH039_00285 FH039_00355	A3L11_02150 A3L11_02220	TIRI35C_2074 TIRI35C_2088	A3L02_07755	CHITON_1652	TEU_01960	A7C91_04220	A3K92_08510	BD01_1891	TGAM_0045	TON_1584	CL1_1140	X802_04290	A3L08_01745	A0127_05305	TK2082	A3L09_01655	PAB1885	PH1428	PF1425	PYCH_11250	TQ32_09875	PAP_01105 PAP_01175
Membrane-bound hydrogenase MbhD subunit	TES1_1475 TES1_1461	TERMP_01495 TERMP_01481	TBCH5_1745 TBCH5_1731	A3L10_08165 A3L10_08235	A3L01_08685 A3L01_08755	TSIB_1306 TSIB_1292	OCC_08709 OCC_08639	FH039_00290 FH039_00360	A3L11_02155 A3L11_02225	TIRI35C_2075 TIRI35C_2089	A3L02_07760	CHITON_1651	TEU_01965	A7C91_04215	A3K92_08515	BD01_1890	TGAM_0044	TON_1585	CL1_1139	X802_04285	A3L08_01750	A0127_05310	TK2083	A3L09_01660	+	PHS039	PF1426	PYCH_11260	TQ32_09880	PAP_01110 PAP_01180
Membrane-bound hydrogenase MbhE subunit	TES1_1474 TES1_1460	TERMP_01494 TERMP_01480	TBCH5_1744 TBCH5_1730	A3L10_08170 A3L10_08240	A3L01_08690 A3L01_08760	TSIB_1305 TSIB_1291	OCC_08704 OCC_08634	FH039_00295 FH039_00365	A3L11_02160 A3L11_02230	TIRI35C_2076 TIRI35C_2090	A3L02_07765	CHITON_1650	TEU_01970	A7C91_04210	A3K92_08520	BD01_1889	TGAM_0043	TON_1586	CL1_1138	X802_04280	A3L08_01755	A0127_05315	TK2084	A3L09_01665	PAB1886	PHS039.1	PF1427	PYCH_11270	TQ32_09885	PAP_01115 PAP_01185
Membrane-bound hydrogenase MbhF subunit	TES1_1473 TES1_1459	TERMP_01493 TERMP_01479	TBCH5_1743 TBCH5_1729	A3L10_08175 A3L10_08245	A3L01_08695 A3L01_08765	TSIB_1304 TSIB_1290	OCC_08699 OCC_08629	FH039_00300 FH039_00370	A3L11_02165 A3L11_02235	TIRI35C_2077 TIRI35C_2091	A3L02_07770	CHITON_1650	TEU_01975	A7C91_04205	A3K92_08525	BD01_1888	TGAM0042	TON_1587	CL1_1137	X802_04275	A3L08_01760	A0127_05320	TK2085	A3L09_01670	PAB1886	PH1429	PF1428	PYCH__11280	TQ32_09890	PAP_01120 PAP_01190
Membrane-bound hydrogenase MbhG subunit	TES1_1472 TES1_1458	TERMP_01492 TERMP_01478	TBCH5_1742 TBCH5_1728	A3L10_08180 A3L10_08250	A3L01_08700 A3L01_08770	TSIB_1303 TSIB_1289	OCC_08694 OCC_08624	FH039_00305 FH039_00375	A3L11_02170 A3L11_02240	TIRI35C_2078 TIRI35C_2092	A3L02_07775	CHITON_1649	TEU_01980	A7C91_04200	A3K92_08530	BD01_1887	TGAM_0041	TON_1588	CL1_1136	X802_04270	A3L08_01765	A0127_05325	TK2086	A3L09_01675	PAB1887	PH1430	PF1429	PYCH_11290	TQ32_09895	PAP_01125 PAP_01195
Membrane-bound hydrogenase MbhH subunit	TES1_1471 TES1_1457	TERMP_01491 TERMP_01477	TBCH5_1741 TBCH5_1727	A3L10_08185 A3L10_08255	A3L01_08705 A3L01_08775	TSIB_1302 (TSIB_1288)	OCC_08689 OCC_08619	FH039_00310 FH039_00380	A3L11_02175 A3L11_02245	TIRI35C_2079 TIRI35C_2093	A3L02_07780	CHITON_1648	TEU_01985	A7C91_04195	A3K92_08535	BD01_1886	TGAM_0040	TON_1589	CL1_1135	X802_04265	A3L08_01770	A0127_05330	TK2087	A3L09_01680	PAB1888	PH1431	PF1430	PYCH_11300	TQ32_09900	PAP_01130 PAP_01200
Membrane-bound hydrogenase MbhI subunit	TES1_1470	TERMP_01490	TBCH5_1740	A3L10_08190	A3L01_08710	TSIB_1301	OCC_08684	FH039_00315	A3L11_02180	TIRI35C_2080	A3L02_07785	CHITON_1647	TEU_01990	A7C91_04190	A3K92_08540	BD01_1885	TGAM_0039	TON_1590	CL1_1134	X802_04260	A3L08_01775	A0127_05335	TK2088	A3L09_01685	PAB1889	PH1433	PF1431	PYCH_11310	TQ32_09905	PAP_01135
Membrane-bound hydrogenase MbhI subunit	TES1_1456	TERMP_01476	TBCH5_1726	A3L10_08260	A3L01_08780	TSIB_1287	OCC_08614	FH039_00385	A3L11_02250	TIRI35C_2094	-	-	-	-	-	-	-	-	-	-	-	-	-	-	-	-	-	-	-	PAP_01205
Membrane-bound hydrogenase MbhJ subunit	TES1_1469 TES1_1455	TREMP_01489 TERMP_01475	TBCH5_1739 TBCH5_1725	A3L10_08195 A3L10_08265	A3L01_08715 A3L01_08785	TSIB_1300 TSIB_1286	OCC_08679 OCC_08609	FH039_00320 FH039_00390	A3L11_02185 A3L11_02255	TIRI35C_2081 TIRI35C_2095	A3L02_07790	CHITON_1646	TEU_02000	A7C91_04185	A3K92_08545	BD01_1884	TGAM_0038	TON_1591	CL1_1133	X802_04255	A3L08_01780	A0127_05340	TK2089	A3L09_01690	PAB1890	PH1434	PF1432	PYCH_11320	TQ32_09910	PAP_01140 PAP_01210	MK0464	Metok_1054	+	Metig_1623	+	MJ0516	Mefer_0332	Metvu0487	JH146_0220	Metin_1296
Membrane-bound hydrogenase MbhK subunit	TES1_1468 TES1_1454	TREMP_01488 TREMP_01474	TBCH5_1738 TBCH5_1724	A3L10_08200 A3L10_08270	A3L01_08720 A3L01_08790	TSIB_1299 TSIB_1285	OCC_08674 OCC_08604	FH039_00325 FH039_00395	A3L11_02190 A3L11_02260	TIRI35C_2082 TIRI35C_2096	A3L02_07795	CHITON_1645	TEU_02005	A7C91_04180	A3K92_08550	BD01_1883	TGAM_0037	TON_1592	CL1_1132	X802_04250	A3L08_01785	A0127_05345	TK2090	A3L09_01695	PAB1891	PH1435	PF1433	PYCH_11330	TQ32_09915	PAP_01145 PAP_01215
Membrane-bound hydrogenase NiFe MbhL subunit	TES1_1467 TES1_1453	TERMP_01487 TERMP_01473	TBCH5_1737 TBCH5_1723	A3L10_08205 A3L10_08275	A3L01_08725 A3L01_08795	TSIB_1298 TSIB_1284	OCC_08669 OCC_08599	FH039_00330 FH039_00400	A3L11_02195 A3L11_02265	TIRI35C_2083 TIRI35C_2097	A3L02_07800	CHITON_1644	TEU_02010	(A7C91_04175)	A3K92_08555	BD01_1882	TGAM_0036	TON_1593	CL1_1131	X802_04245	A3L08_01790	A0127_05350	TK2091	A3L09_01700	PAB1892	PH1437	PF1434	PYCH_11340	TQ32_09920	PAP_01150 PAP_01220	MK0463	Metok_0030	+	Metig_1624	+	MJ0515 MJ1027	Mefer_0333	Metvu_0488	JH146_0221	Metin_1295
Membrane-bound hydrogenase MbhM subunit	TES1_1466 TES1_1452	TERMP_01486 TERMP_01472	TBCH5_1736 TBCH5_1722	A3L10_08210 A3L10_08285	A3L01_08730 A3L01_08800	TSIB_1297 TSIB_1283	OCC_08664 OCC_08594	FH039_00335	A3L11_02200 A3L11_02270	TIRI35C_2084 TIRI35C_2098	A3L02_07805	CHITON_1643	TEU_02015	A7C91_04170	A3K92_08560	BD01_1881	TGAM_0035	TON_1594	CL1_1130	X802_04240	A3L08_01795	A0127_05355	TK2092	A3L09_01705	PAB1893	PH1439	PF1435	PYCH_11350	TQ32_09925	PAP_01155 PAP_01225
Membrane-bound hydrogenase MbhN subunit	TES1_1465 TES1_1451	TERMP_01485 TERMP_01471	TBCH5_1735 TBCH5_1721	A3L10_08215 A3L10_08290	A3L01_08735 A3L01_08805	TSIB_1296 TSIB_1282	OCC_08659 OCC_08589	FH039_00340 FH039_00410	A3L11_02205 A3L11_02275	TIRI35C_2085 TIRI35C_2099	A3L02_07810	CHITON_1642	TEU_02020	A7C91_04165	A3K92_08565	BD01_1880	TGAM_0034	TON_1595	CL1_1129	X802_04235	A3L08_01800	A0127_05360	TK2093	A3L09_01710	PAB1894	PH1440	PF1436	PYCH_11360	TQ32_09930	PAP_01160 PAP_01230	MK1001			Metig_1628	+	MJ0514	Mefer_0335	Metvu_0490	JH146_0223	Metin_0386

## Sheet: sh
	Tpar	TbarMP	TbarCH5	Tsib	Tlit	Tonn	Trad	Tind	Tguay	Tbar	Tpiez	Tsic	Tpep	Tcel	Tcam	Tprof	Tcle	Tnau	Tchi	Tkod	Tpac	Tgorg	Teury	Phor	Pfur	Paby	Pyay	Pkuk	Ppac
sulfhydrogenase subunit beta	TES1_0164	TERMP_00067 TERMP_00539	TBCH5_2714 TBCH5_0660	TSIB_1520 TSIB_0282	OCC_03052 OCC_12231	TON_0055 TON_0537	A3L10_05625 A3L10_03140	FH039_02790 FH039_05985	X802_03235 X802_07575	A3L01_00935 A3L01_03430	A7C91_06200 A7C91_08740	A3L11_04690 A3L11_07390	A0127_07150 A0127_05290	A3L02_00955 A3L02_02375	TIRI35C_0409 TIRI35C_0921	A3L09_05730 A3L09_05675	CL1_0641 CL1_0141	BD01_2065 BD01_0440	CHITON_0947 CHITON_1017	TK2072	A3L08_06495	A3K92_08495	TEU_09740	PH1290		PAB0638 PAB1784	PYCH_00020 PYCH_08400	TQ32_03130 TQ32_02775	PAP_01505 PAP_03240
sulfhydrogenase subunit gamma	TES1_0165	TERMP_00068 TERMP_00538	TBCH5_2715 TBCH5_0661	TSIB_1521 TSIB_0283	OCC_03057 OCC_12226	TON_0054 TON_0536	A3L10_05630 A3L10_03145	FH039_02785 FH039_05980	X802_03240 X802_07570	A3L01_00930 A3L01_03425	A7C91_06195 A7C91_08735	A3L11_04685 A3L11_07385	A0127_07145 A0127_05285	A3L02_00960 A3L02_02380	TIRI35C_0408 TIRI35C_0920	A3L09_05735 A3L09_05680	CL1_0642 CL1_0142	BD01_2066 BD01_0439	CHITON_0948 CHITON_1018	TK2071	A3L08_06490	A3K92_08490	TEU_09735	PH1291		PAB0639 PAB1785	PYCH_00030 PYCH_08390	TQ32_03125 TQ32_02780	PAP_01500 PAP_03245
sulfhydrogenase subunit delta	TES1_0166	TERMP_00069 TERMP_00537	TBCH5_2716 TBCH5_0662	TSIB_1522 TSIB_0284	OCC_03062 OCC_12221	TON_0053 TON_0535	A3L10_05635 A3L10_03150	FH039_02780 FH039_05975	X802_03245 X802_07565	A3L01_00925 A3L01_03420	A7C91_06190 A7C91_08730	A3L11_04680 A3L11_07380	A0127_07140 A0127_05280	A3L02_00965 A3L02_02385	TIRI35C_0407 TIRI35C_0919	A3L09_05740 A3L09_05685	CL1_0643 CL1_0143	BD01_2067 BD01_0438	CHITON_0949 CHITON_1019	TK2070	A3L08_06485	A3K92_08485	TEU_09730	PH1292		PAB0640 PAB1786	PYCH_00040 PYCH_08380	TQ32_03120 TQ32_02785	PAP_01495 PAP_03250
sulfhydrogenase subunit alpha	TES1_0167	TERMP_00070 TERMP_00536	TBCH5_2717	TSIB_1523 TSIB_0285	OCC_03067 OCC_12216	TON_0052 TON_0534	A3L10_05640 A3L10_03155	FH039_02775 FH039_05970	X802_03250 X802_07560	A3L01_00920 A3L01_03415	A7C91_06185 A7C91_08725	A3L11_04675 A3L11_07375	A0127_07135 A0127_05275	A3L02_00970 A3L02_02390	TIRI35C_0406 TIRI35C_0918	A3L09_05745 A3L09_05690	CL1_0644 CL1_0144	BD01_2068 BD01_0437	CHITON_0950 CHITON_1020	TK2069	A3L08_06480	A3K92_08480	TEU_09725	PH1294		PAB0641 PAB1787	PYCH_00050 PYCH_08370	TQ32_03115 TQ32_02790	PAP_01490 PAP_03255

## Sheet: frh
	Tpar	TbarCH5	Tnau	Tpiez	Tonn	Tcle	Tgam	Tguay	Teury	Tpac	Pind	Pyay	Pkuk
Ni-dependent hydrogenase, large subunit	TES1_1501	TBCH5_1772	BD01_1902	A7C91_04340	TON_1559	CL1_1151	TGAM_0068	X802_04315	TEU_01935	A3L08_06600	-	PYCH_10960	TQ32_09745
4Fe-4S binding protein	TES1_1500	TBCH5_1771	BD01_1901	A7C91_04335	TON_1560	CL1_1150	TGAM_0067	X802_04310	TEU_01940	A3L08_06605	FH039_06095	PYCH_10970	TQ32_09750
F420 hydrogenase, beta subunit	TES1_1499	TBCH5_1770	BD01_1900	A7C91_04330	TON_1561	CL1_1149	TGAM_0066	X802_04305	TEU_01945	A3L08_06610	FH039_06100	PYCH_10980	TQ32_09755
Ni-dependent hydrogenase, large subunit	TES1_1498	TBCH5_1769	-	-	-	-	-	-	-	-	-	-	-

[truncated: 1 more sheets: codh]
